# Supplementary material for: Practice structure and quality improvement activities among emergency departments in the Emergency Quality (E‐QUAL) Network
Source: PubMed Central journal article supplement — J Am Coll Emerg Physicians Open. 2020 May 12;1(5):839–44. doi: 10.1002/emp2.12078 (PMC7593479; doi:10.1002/emp2.12078), 2020-05-12
Supplement: EMP2-1-839-s001.pdf [file EMP2-1-839-s001.pdf]

**Sites responding to Quality Readiness Assessment**

**511**

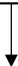

Sites that provided taxpayer identification number data

395

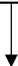

Sites that participated in sepsis or imaging collaboratives in 2018

394

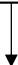

Excluding multispecialty sites

388

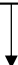

Excluding solo sites

377
