# Supplementary material for: Practice structure and quality improvement activities among emergency departments in the Emergency Quality (E‐QUAL) Network
Source: PubMed Central journal article supplement — J Am Coll Emerg Physicians Open. 2020 May 12;1(5):839–44. doi: 10.1002/emp2.12078 (PMC7593479; doi:10.1002/emp2.12078), 2020-05-12
Supplement: EMP2-1-839-s002.pdf [file EMP2-1-839-s002.pdf]

## SITE-LEVEL ANALYSIS

### 1 SINGLE-SITE ED

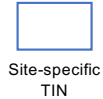

Site-specific  
TIN

Group name: Alpha

### 3 MULTI-SITE EDs

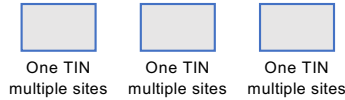

One TIN  
multiple sites    One TIN  
multiple sites    One TIN  
multiple sites

Group name: Beta

---

## GROUP-LEVEL ANALYSIS

### 1 SMALL-GROUP

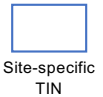

Site-specific  
TIN

Group name: Alpha

### 1 SMALL-GROUP

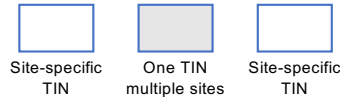

Site-specific  
TIN    One TIN  
multiple sites    Site-specific  
TIN

Group name: Gamma  
(disagreement among sites  
about billing practices;  
majority favor independence)

### 1 LARGE-GROUP

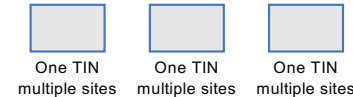

One TIN  
multiple sites    One TIN  
multiple sites    One TIN  
multiple sites

Group name: Beta

### 1 LARGE-GROUP

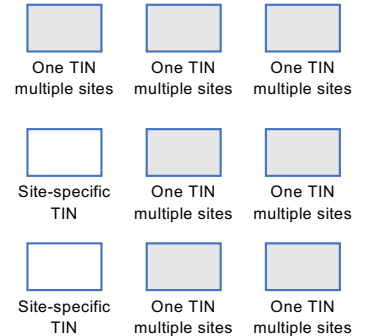

One TIN  
multiple sites    One TIN  
multiple sites    One TIN  
multiple sites

Site-specific  
TIN    One TIN  
multiple sites    One TIN  
multiple sites

Site-specific  
TIN    One TIN  
multiple sites    One TIN  
multiple sites

Group name: Delta  
(disagreement among sites  
about billing practices;  
majority favors unity)
